# Supplementary material for: Changes of signaling molecules in the axotomized rat facial nucleus
Source: Research Square preprint supplement (doi:10.21203/rs.3.rs-1674940/v1), 2022-05-27

**Table 1 Outline of changes in transcription factors and MAPKs**

The results of time course experiments (Fig. 2-8) and of immunohistochemical studies (Fig. 2-8) are summarized. The tendency of each molecule to be upregulated, remain constant, or be downregulated over the time course is roughly shown by an arrow as follows:

: upregulation, →: no change (constant level), : downregulation,

no arrow: unknown.


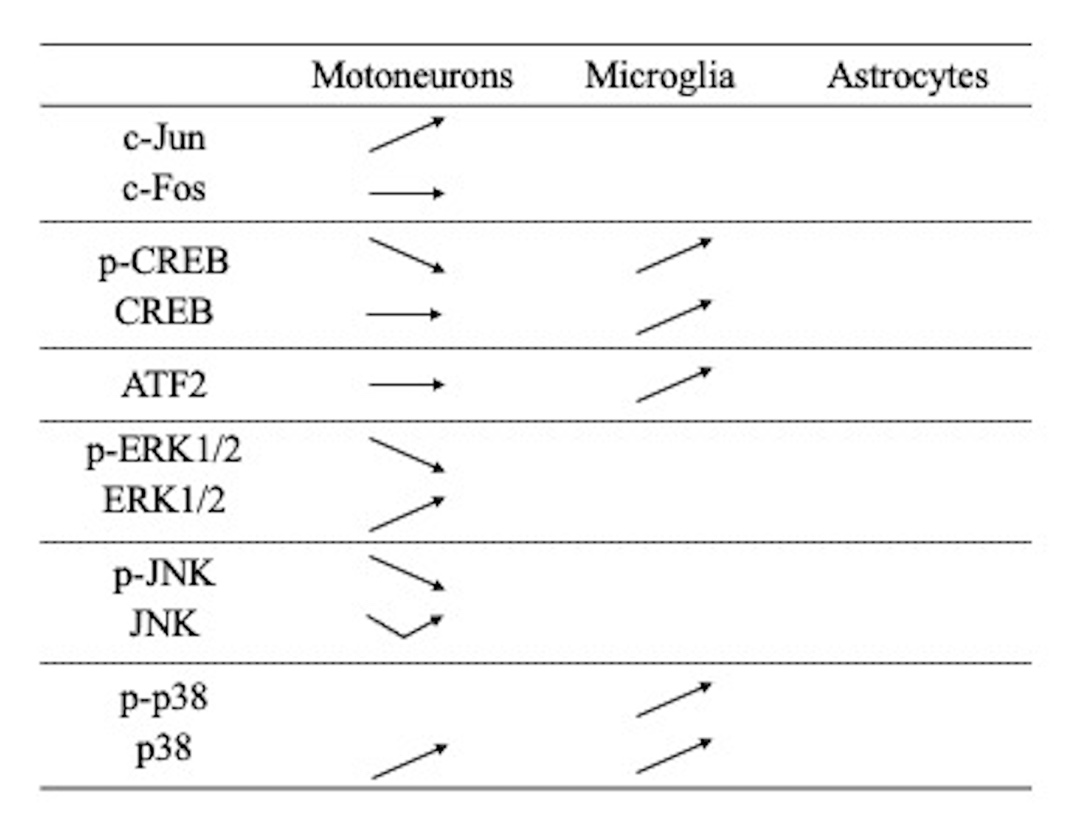

Supplement: Supplementary file 1 [file dd58b15a05ba94bb01853b8f.docx]
